# Supplementary material for: Intracerebral hemorrhage location and outcome among INTERACT2 participants
Source: PubMed Central journal article supplement (PMC5386433; doi:10.1212/wnl.0000000000003771), 2017-04-11
Supplement: supp_WNL.0000000000003771_e-Tables.pdf [file supp_WNL.0000000000003771_e-Tables.pdf]

**Table e-1. Most common patterns of ICH (when present in more than 10 patients)**

| <b>Number of patients</b> | <b>Single or multiple sites</b> | <b>Locations</b>                                                                           |
|---------------------------|---------------------------------|--------------------------------------------------------------------------------------------|
| 342                       | Single                          | Putamen/globus pallidus                                                                    |
| 339                       | Multiple (2)                    | Thalamus and posterior limb of internal capsule                                            |
| 236                       | Multiple (3)                    | Posterior limb of internal capsule, putamen/globus pallidus and external capsule           |
| 181                       | Single                          | Thalamus                                                                                   |
| 181                       | Single                          | Lobar                                                                                      |
| 177                       | Multiple (2)                    | Putamen/globus pallidus and posterior limb of internal capsule                             |
| 153                       | Multiple (2)                    | Putamen/globus pallidus and external capsule                                               |
| 138                       | Single                          | Infratentorial                                                                             |
| 50                        | Multiple (4)                    | Posterior limb of internal capsule, putamen/globus pallidus, external capsule, lobar       |
| 48                        | Multiple (3)                    | Thalamus, posterior limb of internal capsule, putamen/globus pallidus                      |
| 28                        | Multiple (4)                    | Thalamus, posterior limb of internal capsule, putamen/globus pallidus and external capsule |
| 19                        | Multiple (3)                    | Putamen/globus pallidus, external capsule and lobar                                        |
| 18                        | Multiple (3)                    | Anterior limb of internal capsule, putamen/globus pallidus, external capsule               |
| 18                        | Multiple (2)                    | Anterior limb of internal capsule and putamen/globus pallidus                              |

Abbreviations: ICH = intracerebral hemorrhage.

869 ICH encompassed single locations and 1197 multiple locations.

**Table e-2. Multivariable logistic regression analyses for associations between ICH sites and outcome**

|                                         | Death or major disability |                        | Major disability |                        | Death |                        |
|-----------------------------------------|---------------------------|------------------------|------------------|------------------------|-------|------------------------|
|                                         | OR                        | 95% CI                 | OR               | 95% CI                 | OR    | 95% CI                 |
| Age (yr)                                | 1.05                      | 1.04-1.06 <sup>c</sup> | 1.01             | 1.01-1.02 <sup>c</sup> | 1.05  | 1.04-1.06 <sup>c</sup> |
| Female                                  | 1.01                      | 0.81-1.26              | 1.16             | 0.95-1.41              | 0.69  | 0.50-0.94 <sup>a</sup> |
| China region                            | 0.61                      | 0.47-0.79 <sup>c</sup> | 0.69             | 0.55-0.86 <sup>b</sup> | 0.96  | 0.68-1.36              |
| Systolic BP (mm Hg)                     | 1.00                      | 1.00-1.01              | 1.00             | 0.99-1.00              | 1.02  | 1.01-1.03 <sup>c</sup> |
| High NIHSS ( $\geq 11$ vs. $< 11$ )     | 4.20                      | 3.30-5.34 <sup>c</sup> | 2.53             | 2.02-3.17 <sup>c</sup> | 3.21  | 2.14-4.81 <sup>c</sup> |
| Ischemic stroke                         | 1.50                      | 1.03-2.19 <sup>a</sup> | 1.33             | 0.96-1.85              | 1.07  | 0.66-1.72              |
| Diabetes                                | 1.32                      | 0.93-1.89              | 1.27             | 0.93-1.73              | 0.94  | 0.59-1.50              |
| Antihypertensives                       | 0.96                      | 0.76-1.20              | 0.92             | 0.75-1.12              | 1.15  | 0.83-1.58              |
| Lipid lowering agents                   | 0.94                      | 0.57-1.55              | 0.85             | 0.56-1.28              | 1.09  | 0.63-1.90              |
| Antithrombotics                         | 1.11                      | 0.73-1.68              | 0.89             | 0.63-1.27              | 1.13  | 0.71-1.81              |
| Intensive BP lowering treatment         | 0.95                      | 0.77-1.18              | 0.94             | 0.78-1.14              | 1.00  | 0.74-1.34              |
| Time from onset to CT (hr) <sup>d</sup> | 0.81                      | 0.68-0.96 <sup>a</sup> | 0.83             | 0.71-0.97 <sup>a</sup> | 1.03  | 0.80-1.32              |
| Baseline ICH volume (mL) <sup>d</sup>   | 1.81                      | 1.55-2.11 <sup>c</sup> | 1.30             | 1.14-1.49 <sup>c</sup> | 1.93  | 1.52-2.46 <sup>c</sup> |

|                                    |      |                        |      |                        |      |                        |
|------------------------------------|------|------------------------|------|------------------------|------|------------------------|
| Intraventricular extension of ICH  | 1.15 | 0.85-1.56              | 0.87 | 0.67-1.13              | 1.25 | 0.84-1.85              |
| Left hemisphere ICH                | 1.03 | 0.83-1.28              | 1.25 | 1.03-1.52 <sup>a</sup> | 0.66 | 0.48-0.89 <sup>b</sup> |
| ICH location                       |      |                        |      |                        |      |                        |
| Caudate head                       | 0.42 | 0.16-1.14              | 0.24 | 0.09-0.62 <sup>b</sup> | 2.19 | 0.77-6.26              |
| Thalamus                           | 2.24 | 1.40-3.57 <sup>c</sup> | 1.18 | 0.82-1.71              | 1.97 | 1.18-3.29 <sup>b</sup> |
| Putamen/globus pallidus            | 1.36 | 0.87-2.14              | 0.86 | 0.60-1.22              | 1.11 | 0.68-1.82              |
| External capsule                   | 1.05 | 0.78-1.40              | 0.96 | 0.74-1.25              | 1.23 | 0.81-1.87              |
| Anterior limb of internal capsule  | 1.03 | 0.56-1.91              | 1.00 | 0.59-1.71              | 0.94 | 0.45-1.97              |
| Posterior limb of internal capsule | 2.10 | 1.65-2.68 <sup>c</sup> | 1.81 | 1.45-2.26 <sup>c</sup> | 1.04 | 0.72-1.51              |
| Lobar                              | 1.34 | 0.86-2.08              | 0.61 | 0.43-0.88 <sup>b</sup> | 1.95 | 1.21-3.15 <sup>b</sup> |
| Infratentorial                     | 3.04 | 1.68-5.50 <sup>c</sup> | 1.27 | 0.77-2.11              | 2.45 | 1.09-5.50 <sup>a</sup> |

<sup>a</sup> 0.01 ≤ p ≤ 0.05, <sup>b</sup> 0.001 ≤ p < 0.01, <sup>c</sup> p < 0.001, <sup>d</sup> Log-transformed

Abbreviations: ICH = intracerebral hemorrhage; OR= odds ratio, CI=confidence interval; BP = blood pressure; NIHSS = National Institutes of Health Stroke Scale; CT = computed tomography.

The c statistics for the models of death or major disability, major disability, and death were 0.83, 0.72, and 0.82, respectively.

**Table e-3. Multivariable logistic regression analyses for associations between ICH location and HRQoL measured by the EQ-5D scale, by utility score ( $\leq 0.7$  vs.  $> 0.7$ ) and dimension (some/moderate or severe problems vs. no problem)**

|                                         | Utility score |                        | Mobility |                        | Self-care |                        | Usual activity |                        | Pain/discomfort |                        | Anxiety/depression |                        |
|-----------------------------------------|---------------|------------------------|----------|------------------------|-----------|------------------------|----------------|------------------------|-----------------|------------------------|--------------------|------------------------|
|                                         | OR            | 95% CI                 | OR       | 95% CI                 | OR        | 95% CI                 | OR             | 95% CI                 | OR              | 95% CI                 | OR                 | 95% CI                 |
| Age (yr)                                | 1.03          | 1.02-1.04 <sup>c</sup> | 1.03     | 1.02-1.04 <sup>c</sup> | 1.03      | 1.02-1.05 <sup>c</sup> | 1.03           | 1.02-1.04 <sup>c</sup> | 1.01            | 1.00-1.02              | 1.02               | 1.01-1.02 <sup>b</sup> |
| Female                                  | 1.23          | 0.98-1.55              | 1.04     | 0.82-1.31              | 1.08      | 0.85-1.37              | 1.04           | 0.81-1.33              | 1.29            | 1.04-1.58 <sup>a</sup> | 1.08               | 0.87-1.34              |
| China region                            | 0.73          | 0.56-0.95 <sup>a</sup> | 0.89     | 0.67-1.18              | 0.68      | 0.51-0.90 <sup>b</sup> | 0.47           | 0.35-0.64 <sup>c</sup> | 1.21            | 0.95-1.55              | 0.76               | 0.59-0.98 <sup>a</sup> |
| Systolic BP (mm Hg)                     | 1.00          | 1.00-1.01              | 1.00     | 1.00-1.01              | 1.00      | 1.00-1.01              | 1.00           | 0.99-1.01              | 1.00            | 0.99-1.01              | 1.01               | 1.00-1.01              |
| High NIHSS ( $\geq 11$ vs. $< 11$ )     | 2.80          | 2.18-3.58 <sup>c</sup> | 3.03     | 2.33-3.95 <sup>c</sup> | 3.84      | 2.97-4.96 <sup>c</sup> | 3.95           | 3.00-5.20 <sup>c</sup> | 2.15            | 1.70-2.72 <sup>c</sup> | 1.81               | 1.42-2.31 <sup>c</sup> |
| Ischemic stroke                         | 1.09          | 0.73-1.62              | 1.38     | 0.91-2.08              | 1.40      | 0.93-2.11              | 1.01           | 0.66-1.53              | 0.82            | 0.58-1.18              | 0.96               | 0.66-1.39              |
| Diabetes                                | 1.07          | 0.74-1.55              | 1.17     | 0.80-1.72              | 1.35      | 0.92-1.98              | 1.28           | 0.85-1.93              | 0.74            | 0.53-1.03              | 0.89               | 0.63-1.26              |
| Antihypertensives                       | 1.07          | 0.85-1.35              | 0.88     | 0.70-1.11              | 0.98      | 0.77-1.24              | 0.95           | 0.74-1.21              | 1.13            | 0.91-1.39              | 1.20               | 0.96-1.49              |
| Lipid lowering agents                   | 0.95          | 0.56-1.62              | 0.87     | 0.51-1.50              | 0.68      | 0.39-1.18              | 0.71           | 0.39-1.29              | 1.48            | 0.94-2.34              | 1.09               | 0.68-1.73              |
| Antithrombotics                         | 1.93          | 1.25-2.98 <sup>b</sup> | 1.30     | 0.82-2.06              | 1.26      | 0.80-1.9               | 2.03           | 1.22-3.38 <sup>b</sup> | 1.09            | 0.74-1.60              | 1.40               | 0.94-2.06              |
| Intensive BP lowering treatment         | 0.88          | 0.71-1.09              | 1.04     | 0.83-1.29              | 0.90      | 0.72-1.13              | 0.80           | 0.63-1.01              | 0.88            | 0.72-1.07              | 1.00               | 0.81-1.23              |
| Time from onset to CT (hr) <sup>d</sup> | 0.76          | 0.64-0.91 <sup>b</sup> | 0.73     | 0.61-0.88 <sup>c</sup> | 0.79      | 0.66-0.95 <sup>a</sup> | 0.77           | 0.64-0.93 <sup>b</sup> | 0.93            | 0.79-1.09              | 0.91               | 0.77-1.07              |
| Baseline ICH volume (mL) <sup>d</sup>   | 1.81          | 1.53-2.14 <sup>c</sup> | 1.54     | 1.32-1.79 <sup>c</sup> | 1.84      | 1.55-2.18 <sup>c</sup> | 1.63           | 1.39-1.92 <sup>c</sup> | 1.20            | 1.04-1.38 <sup>a</sup> | 1.41               | 1.21-1.64 <sup>c</sup> |
| Intraventricular extension of ICH       | 1.15          | 0.84-1.56              | 1.24     | 0.89-1.71              | 1.09      | 0.79-1.50              | 1.22           | 0.87-1.71              | 0.86            | 0.65-1.14              | 0.80               | 0.59-1.07              |
| Left hemisphere ICH                     | 1.01          | 0.80-1.26              | 1.06     | 0.84-1.33              | 1.01      | 0.80-1.27              | 1.26           | 0.99-1.59              | 0.89            | 0.73-1.09              | 0.97               | 0.78-1.20              |

| ICH location                               |      |                        |      |                        |      |                        |      |                        |      |                        |      |                        |
|--------------------------------------------|------|------------------------|------|------------------------|------|------------------------|------|------------------------|------|------------------------|------|------------------------|
| Caudate head                               | 0.26 | 0.08-0.82 <sup>a</sup> | 1.59 | 0.57-4.47              | 0.28 | 0.09-0.89 <sup>a</sup> | 0.32 | 0.10-1.00              | 0.60 | 0.23-1.60              | 0.24 | 0.07-0.83 <sup>a</sup> |
| Thalamus                                   | 2.14 | 1.32-3.48 <sup>b</sup> | 2.42 | 1.45-4.05 <sup>c</sup> | 2.28 | 1.37-3.82 <sup>b</sup> | 3.00 | 1.69-5.31 <sup>c</sup> | 0.90 | 0.60-1.35              | 1.31 | 0.86-1.99              |
| Putamen/globus pallidus                    | 1.27 | 0.80-2.02              | 1.34 | 0.81-2.20              | 1.24 | 0.76-2.02              | 1.59 | 0.92-2.76              | 0.82 | 0.55-1.21              | 0.98 | 0.66-1.48              |
| External capsule                           | 0.98 | 0.73-1.33              | 1.16 | 0.86-1.57              | 1.19 | 0.87-1.62              | 1.17 | 0.85-1.61              | 0.86 | 0.65-1.13              | 0.75 | 0.56-1.00              |
| Anterior limb of internal capsule          | 1.33 | 0.70-2.53              | 0.72 | 0.38-1.35              | 1.12 | 0.58-2.18              | 0.79 | 0.40-1.55              | 1.11 | 0.63-1.95              | 1.50 | 0.83-2.72              |
| Posterior limb of internal capsule         | 1.87 | 1.45-2.40 <sup>c</sup> | 1.54 | 1.19-1.99 <sup>b</sup> | 2.04 | 1.57-2.65 <sup>c</sup> | 1.70 | 1.30-2.23 <sup>c</sup> | 1.51 | 1.19-1.90 <sup>c</sup> | 1.41 | 1.11-1.80 <sup>b</sup> |
| Lobar                                      | 1.18 | 0.74-1.87              | 1.23 | 0.74-2.03              | 1.08 | 0.66-1.76              | 1.51 | 0.88-2.62              | 0.71 | 0.47-1.08              | 1.03 | 0.67-1.57              |
| Infratentorial                             | 2.81 | 1.52-5.20 <sup>b</sup> | 4.03 | 2.16-7.50 <sup>c</sup> | 2.57 | 1.35-4.87 <sup>b</sup> | 3.66 | 1.88-7.15 <sup>c</sup> | 1.11 | 0.66-1.89              | 1.35 | 0.77-2.38              |
| Proxy responder at 90-day HRQoL assessment | 1.72 | 1.37-2.15 <sup>c</sup> | 1.84 | 1.45-2.33 <sup>c</sup> | 2.44 | 1.93-3.08 <sup>c</sup> | 2.44 | 1.90-3.13 <sup>c</sup> | 1.14 | 0.93-1.41              | 1.32 | 1.07-1.64 <sup>a</sup> |

<sup>a</sup> 0.01 ≤ p ≤ 0.05, <sup>b</sup> 0.001 ≤ p < 0.01, <sup>c</sup> p < 0.001, <sup>d</sup> Log-transformed

Abbreviations: ICH = intracerebral hemorrhage; HRQoL = Health-related Quality of Life; EQ-5D = European Quality of life five dimensions; OR= odds ratio, CI = confidence interval; BP = blood pressure; NIHSS = National Institutes of Health Stroke Scale; CT = computed tomography.

The c statistics for the models of utility score, mobility, self-care, usual activity, pain/discomfort and anxiety/depression were 0.79, 0.78, 0.83, 0.82, 0.66, and 0.69, respectively.

**Table e-4. Multivariable logistic regression analyses for associations between ICH location and outcome (not adjusted for baseline NIHSS)**

|                                    | Death or major disability |                        | Major disability |                        | Death |                        |
|------------------------------------|---------------------------|------------------------|------------------|------------------------|-------|------------------------|
|                                    | OR                        | 95% CI                 | OR               | 95% CI                 | OR    | 95% CI                 |
| Caudate head                       | 0.37                      | 0.14-0.94 <sup>b</sup> | 0.21             | 0.08-0.55 <sup>b</sup> | 1.81  | 0.65-5.04              |
| Thalamus                           | 2.82                      | 1.78-4.47 <sup>c</sup> | 1.33             | 0.93-1.91              | 2.15  | 1.30-3.56 <sup>b</sup> |
| Putamen/globus pallidus            | 1.61                      | 1.04-2.50 <sup>b</sup> | 0.92             | 0.65-1.30              | 1.17  | 0.72-1.91              |
| External capsule                   | 1.10                      | 0.83-1.45              | 0.99             | 0.77-1.28              | 1.24  | 0.82-1.88              |
| Anterior limb of internal capsule  | 1.03                      | 0.58-1.83              | 1.02             | 0.60-1.72              | 0.98  | 0.47-2.06              |
| Posterior limb of internal capsule | 2.18                      | 1.73-2.75 <sup>c</sup> | 1.90             | 1.53-2.36 <sup>c</sup> | 1.14  | 0.79-1.64              |
| Lobar                              | 1.16                      | 0.76-1.77              | 0.55             | 0.38-0.79 <sup>b</sup> | 1.65  | 1.02-2.65 <sup>a</sup> |
| Infratentorial                     | 3.67                      | 2.03-6.61 <sup>c</sup> | 1.40             | 0.85-2.31              | 2.27  | 1.02-5.06 <sup>a</sup> |

<sup>a</sup> 0.01 ≤ p ≤ 0.05, <sup>b</sup> 0.001 ≤ p < 0.01, <sup>c</sup> p < 0.001.

Abbreviations: ICH = intracerebral hemorrhage; OR = odds ratio, CI = confidence interval.

Multivariable models were adjusted for age, female sex, China region, history of ischemic stroke and diabetes, medication history of antihypertensives, antithrombotics and lipid lowering agents, systolic blood pressure, onset to computed tomography time (log-transformed), baseline hematoma volume (log-transformed), caudate head, thalamus, putamen/globus pallidus, external capsule, anterior and posterior limbs of internal capsule, lobar, infratentorial, intraventricular extension of hematoma, ICH laterality and randomization to intensive blood pressure lowering.

**Table e-5. Multivariable logistic regression analyses for associations between ICH location and HRQoL measured by the EQ-5D, by utility score ( $\leq 0.7$  vs.  $> 0.7$ ) and dimension (some/moderate or severe problems vs. no problem; not adjusted for baseline NIHSS)**

|                                    | Utility score |                        | Mobility |                        | Self-care |                        | Usual activity |                        | Pain/discomfort |                        | Anxiety/depression |                        |
|------------------------------------|---------------|------------------------|----------|------------------------|-----------|------------------------|----------------|------------------------|-----------------|------------------------|--------------------|------------------------|
|                                    | OR            | 95% CI                 | OR       | 95% CI                 | OR        | 95% CI                 | OR             | 95% CI                 | OR              | 95% CI                 | OR                 | 95% CI                 |
| Caudate head                       | 0.22          | 0.07-0.69 <sup>b</sup> | 1.47     | 0.52-4.16              | 0.23      | 0.07-0.71 <sup>a</sup> | 0.28           | 0.09-0.85 <sup>a</sup> | 0.53            | 0.20-1.42              | 0.22               | 0.06-0.74 <sup>a</sup> |
| Thalamus                           | 2.58          | 1.60-4.17 <sup>c</sup> | 2.95     | 1.77-4.92 <sup>c</sup> | 2.97      | 1.79-4.91 <sup>c</sup> | 3.91           | 2.21-6.89 <sup>c</sup> | 1.02            | 0.68-1.52              | 1.43               | 0.94-2.18              |
| Putamen/globus pallidus            | 1.43          | 0.91-2.26              | 1.54     | 0.94-2.52              | 1.49      | 0.92-2.40              | 1.92           | 1.11-3.31 <sup>a</sup> | 0.88            | 0.60-1.29              | 1.04               | 0.69-1.55              |
| External capsule                   | 1.04          | 0.77-1.39              | 1.22     | 0.91-1.64              | 1.25      | 0.93-1.68              | 1.25           | 0.92-1.69              | 0.90            | 0.69-1.17              | 0.77               | 0.58-1.03              |
| Anterior limb of internal capsule  | 1.32          | 0.71-2.45              | 0.73     | 0.40-1.34              | 1.12      | 0.60-2.11              | 0.81           | 0.43-1.54              | 1.11            | 0.64-1.95              | 1.51               | 0.84-2.71              |
| Posterior limb of internal capsule | 1.92          | 1.50-2.46 <sup>c</sup> | 1.61     | 1.25-2.07 <sup>c</sup> | 2.09      | 1.62-2.68 <sup>c</sup> | 1.76           | 1.36-2.28 <sup>c</sup> | 1.56            | 1.24-1.96 <sup>c</sup> | 1.45               | 1.14-1.85 <sup>b</sup> |
| Lobar                              | 1.03          | 0.65-1.63              | 1.13     | 0.69-1.86              | 0.95      | 0.59-1.52              | 1.38           | 0.81-2.35              | 0.66            | 0.44-0.99 <sup>a</sup> | 0.95               | 0.62-1.45              |
| Infratentorial                     | 3.18          | 1.71-5.89 <sup>c</sup> | 5.05     | 2.70-9.45 <sup>c</sup> | 3.06      | 1.61-5.81 <sup>c</sup> | 4.80           | 2.46-9.38 <sup>c</sup> | 1.22            | 0.72-2.07              | 1.43               | 0.81-2.52              |

<sup>a</sup>  $0.01 \leq p \leq 0.05$ , <sup>b</sup>  $0.001 \leq p < 0.01$ , <sup>c</sup>  $p < 0.001$ .

Abbreviations: ICH = intracerebral hemorrhage; HRQoL = Health-related Quality of Life; EQ-5D = European Quality of life five dimensions; NIHSS = National Institutes of Health Stroke Scale; OR= odds ratio; CI = confidence interval.

Multivariable models were adjusted for age, female sex, China region, history of ischemic stroke and diabetes, medication history of antihypertensives, antithrombotics and lipid lowering agents, systolic blood pressure, onset to computed tomography time (log-transformed), baseline hematoma volume (log-transformed), caudate head, thalamus, putamen/globus pallidus, external capsule, anterior and posterior limbs of internal capsule, lobar, infratentorial, intraventricular extension of hematoma, ICH laterality, randomization to intensive blood pressure lowering management policy, and proxy responders.

**Table e-6. Hematoma volume by site of involvement**

| <b>ICH site</b>                    | <b>N</b> | <b>Median (IQR) <sup>a</sup></b> |
|------------------------------------|----------|----------------------------------|
| Caudate                            | 42       | 14.7 (7.4-26.4)                  |
| Thalamus                           | 640      | 7.6 (4.3-12.1)                   |
| Putamen/globus pallidus            | 1161     | 13.8 (8.3-22.0)                  |
| External capsule                   | 553      | 16.2 (10.9-27.3)                 |
| Anterior limb of internal capsule  | 102      | 18.0 (10.5-31.3)                 |
| Posterior limb of internal capsule | 957      | 11.0 (6.2-19.1)                  |
| Lobar                              | 297      | 25.4 (13.7-43.1)                 |
| Infratentorial                     | 141      | 3.3 (1.5-7.0)                    |

<sup>a</sup> ICH volume in mL.

Abbreviations: ICH = intracerebral hemorrhage; N = number of cases by ICH site; IQR = interquartile range.



**Table e-7. Model fit statistics for table 2 and 3 (main tables and supplemental tables)**

| <b>Primary analysis models</b> | <b>Sensitivity<sup>a</sup></b> | <b>Specificity<sup>a</sup></b> | <b>PPV<sup>a</sup></b> | <b>NPV<sup>a</sup></b> | <b>AUC</b> |
|--------------------------------|--------------------------------|--------------------------------|------------------------|------------------------|------------|
| Death or major disability      | 76.3                           | 71.4                           | 75.3                   | 72.4                   | 0.83       |
| Major disability               | 49.6                           | 75.3                           | 58.5                   | 68.1                   | 0.72       |
| Death                          | 17.2                           | 98.6                           | 62.3                   | 89.5                   | 0.82       |
| EQ-5D utility score            | 64.9                           | 74.8                           | 67.8                   | 72.3                   | 0.79       |
| Mobility                       | 83.9                           | 49.4                           | 75.6                   | 62.1                   | 0.78       |
| Self-care                      | 72.4                           | 74.6                           | 72.9                   | 74.1                   | 0.83       |
| Usual activity                 | 82.3                           | 61.6                           | 78.7                   | 66.9                   | 0.82       |
| Pain and discomfort            | 36.2                           | 79.7                           | 54.4                   | 65.2                   | 0.66       |
| Anxiety and depression         | 26.0                           | 88.5                           | 54.3                   | 69.5                   | 0.69       |

<sup>a</sup> For predicted probability cut-off of 0.5.

Abbreviations: PPV = positive predictive value; NPV = negative predictive value; AUC = area under the receiver operating characteristic curve; EQ-5D = European Quality of life five dimensions.
