# Supplementary material for: Intracerebral hemorrhage location and outcome among INTERACT2 participants
Source: PubMed Central journal article supplement (PMC5386433; doi:10.1212/wnl.0000000000003771), 2017-04-11
Supplement: supp_WNL.0000000000003771_Figure_e-1.pdf [file supp_WNL.0000000000003771_Figure_e-1.pdf]

**Figure e-1. Patient selection flow chart**

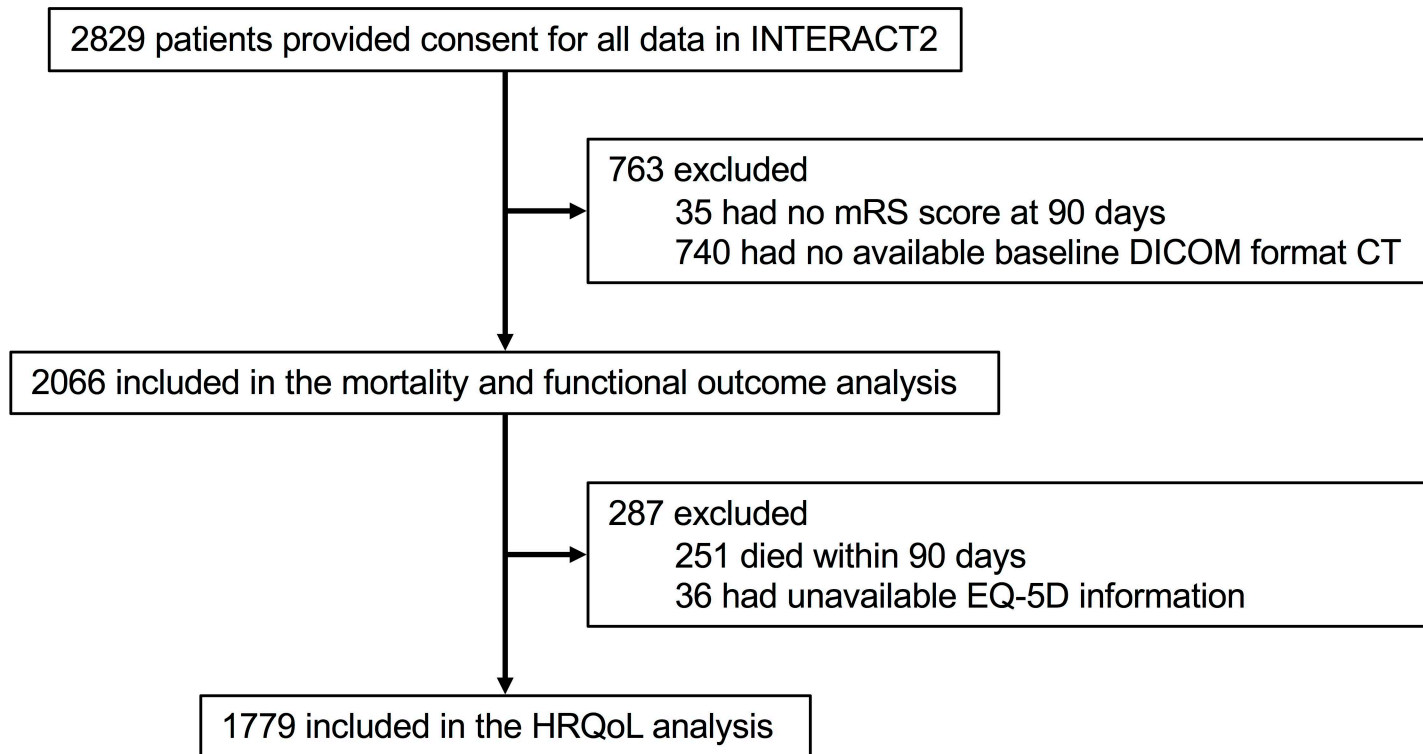

Abbreviations: INTERACT2 = the main phase of Intensive Blood Pressure Reduction in Acute Cerebral Hemorrhage Trial; mRS = modified Rankin Scale; DICOM = Digital Imaging and Communication in Medicine; CT = computed tomography; EQ-5D = European Quality of Life Scale; HRQoL = Health-related Quality of Life.
